# Supplementary material
Source: PubMed Central journal article supplement (PMC3382551)
Supplement: 1203519109_pnas.201203519SI.pdf [file 1203519109_pnas.201203519SI.pdf]

# Supporting Information

Voronin et al. 10.1073/pnas.1203519109

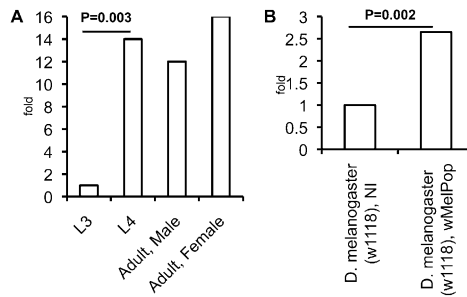

**Fig. S1.** *Atg8a* gene expression in *Brugia malayi* and *Drosophila melanogaster* (w1118). (A) Expression level of *atg8a* in the mosquito vector-derived third-stage larvae (L3), fourth-stage larvae (L4), and adult females. (B) Increased expression of *atg8a* in *D. melanogaster* (w1118) naturally infected with wMelPop compared with noninfected (NI) flies.

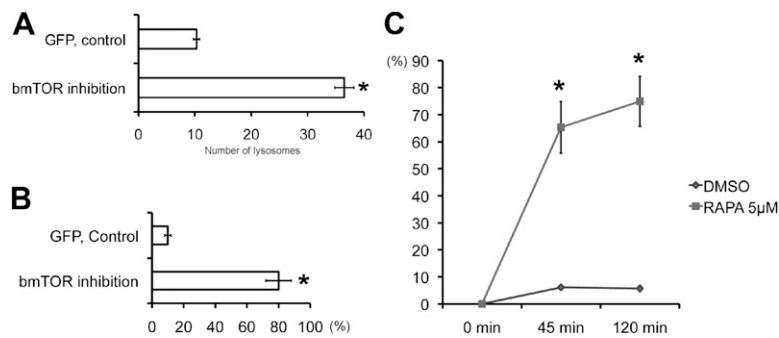

**Fig. S2.** Induction of lysosome production and apoptosis in adult female and mosquito cells after treatment with autophagy inducers. (A) Number of lysosomes per section of the lateral chord of *B. malayi* treated with inhibitors of *B. malayi* target of rapamycin (bmTOR) (siRNA or rapamycin) and controls. (B) Percent of apoptotic-like nuclei in the developing embryos of *B. malayi* after treatment and in the control samples. (C) Percent of lysosome-positive C6/36 (wAlbB) cells after treatment with rapamycin (RAPA) and DMSO (control).

**Table S1. Primers used in the work**

| Primers                                  | 5' sequence                                       |
|------------------------------------------|---------------------------------------------------|
| For siRNA construction (cDNA)            |                                                   |
| T7-bmATG8a-F                             | <u>TAATACGACTCACTATAGGG</u> AAAAATCCATTCGAGAAGC   |
| T7-bmATG8a-R                             | <u>TAATACGACTCACTATAGGG</u> TAGACGCTTTCATCGCTGT   |
| T7-bmTOR-F                               | <u>TAATACGACTCACTATAGGG</u> GATCCAAGTGCTCCATTGGT  |
| T7-bmTOR-R                               | <u>TAATACGACTCACTATAGGG</u> TGTAATTGGTACGCCGATCA  |
| T7-bmATG1-F                              | <u>TAATACGACTCACTATAGGG</u> CATTCCGTGGTTCACCTCTT  |
| T7-bmATG1-R                              | <u>TAATACGACTCACTATAGGG</u> GCTGAGGCCAATCATTCCACT |
| T7-dTOR-F                                | <u>TAATACGACTCACTATAGGG</u> GAGCATCACAAAGGAGTTGCC |
| T7-dTOR-R                                | <u>TAATACGACTCACTATAGGG</u> CATTGCGACAATGTTTTGG   |
| T7-dATG1-F                               | <u>TAATACGACTCACTATAGGG</u> GAGGACGAGAACACGGTGT   |
| T7-dATG1-R                               | <u>TAATACGACTCACTATAGGG</u> AAAGTGGGCAATTTGGTAAGC |
| T7-dATG8a-F                              | <u>TAATACGACTCACTATAGGG</u> GACAACGTCATTCCACCAACA |
| T7-dATG8a-R                              | <u>TAATACGACTCACTATAGGG</u> GCCCAGAAAGGGTGTGAATA  |
| T7-dGFP-F                                | <u>TAATACGACTCACTATAGGG</u> GACGTAAACGGCCACAAGTTC |
| T7-dGFP-R                                | <u>TAATACGACTCACTATAGGG</u> TGCTCAGGTAGTGGTTGTGC  |
| For gene expression (cDNA)               |                                                   |
| bmATG8a-F                                | GAAAAATCCATTCGAGAAGC                              |
| bmATG8a-R                                | GTAGACGCTTTCATCGCTGT                              |
| dATG8a-F                                 | GACAACGTCATTCCACCAACA                             |
| dATG8a-R                                 | GCCCAGAAAGGGTGTGAATA                              |
| For quantitative PCR (gene copies, gDNA) |                                                   |
| dRP49-F                                  | TACAGGCCCAAGATCGTGAA                              |
| dRP49-R                                  | TCTCCTTGCGCTTCTTGGA                               |

The T7 promoter is underlined. Bm, *B. malayi*; d, *D. melanogaster*.
